# Supplementary material for: Reporter gene-engineering of human induced pluripotent stem cells during differentiation renders in vivo traceable hepatocyte-like cells accessible
Source: PubMed Central journal article supplement (PMC6905152; doi:10.1016/j.scr.2019.101599), 2019-12

Phase contrast

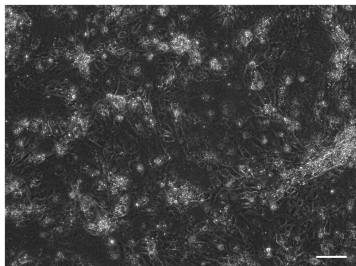

hNIS-mGFP

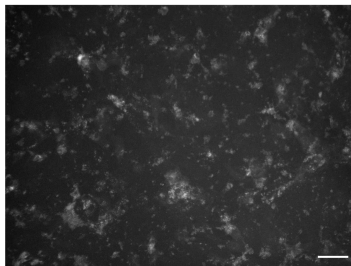

Supplement: mmc2.pdf [file mmc2.pdf]
